1 **Natural selection of glycoprotein B (gB) mutations that rescue the small**  
2 **plaque phenotype of a fusion-impaired herpes simplex virus (HSV) mutant**

3

4 Qing Fan<sup>a</sup>, Sarah J. Kopp<sup>a</sup>, Nina C. Byskosh<sup>a</sup>, Sarah A. Connolly<sup>b</sup> and Richard  
5 Longnecker<sup>a</sup>#

6

7 <sup>a</sup>Department of Microbiology-Immunology, Feinberg School of Medicine of Northwestern  
8 University, Chicago, Illinois, USA

9 <sup>b</sup>Department of Health Sciences, Department of Biological Sciences, DePaul University,  
10 Chicago, Illinois, USA

11

12 #Address correspondence to Richard Longnecker, r-longnecker@northwestern.edu

13

14 **RUNNING HEAD:** gB3A revertant mutations

15 **ABSTRACT WORD COUNT:** 250 words

16 **TOTAL WORD COUNT:** ~4900 words

17 **KEY WORDS:** herpes simplex virus type 1, glycoprotein B, gB, revertant, mutation,  
18 entry, fusion

19

20 **ABSTRACT**

21 Glycoprotein B (gB) is a conserved viral fusion protein that is required for herpesvirus  
22 entry. To mediate fusion with the cellular membrane, gB refolds from a prefusion to a  
23 postfusion conformation. We hypothesize that an interaction between the C-terminal  
24 arm and the central coiled-coil of the herpes simplex virus 1 (HSV-1) gB ectodomain is  
25 critical for fusion. We previously reported that three mutations in the C-terminal arm  
26 (I671A/H681A/F683A, called gB3A) greatly reduced cell-cell fusion and that virus  
27 carrying these mutations had a small plaque phenotype and delayed entry into cells. By  
28 serially passaging gB3A virus, we selected three revertant viruses with larger plaques.  
29 These revertant viruses acquired mutations in gB that restore the fusion function of  
30 gB3A, including gB-A683V, gB-S383F/G645R/V705I/A855V, and gB-T509M/N709H.  
31 V705I and N709H are novel mutations that map to the portion of domain V that enters  
32 domain I in the postfusion structure. S383F, G645R, and T509M are novel mutations  
33 that map to an intersection of three domains in a prefusion model of gB. We introduced  
34 these second-site mutations individually and in combination into wild-type gB and gB3A  
35 to examine the impact of the mutations on fusion and expression. V705I and A855V (a  
36 known hyperfusogenic mutation) restored the fusion function of gB3A, whereas S383F  
37 and G645R dampened fusion and T509M and N709H worked in concert to restore  
38 gB3A fusion. The results identify two regions in the gB ectodomain that modulate the  
39 fusion activity of gB, potentially by impacting intramolecular interactions and stability of  
40 the prefusion and/or postfusion gB trimer.

## 41 **IMPORTANCE**

42 Glycoprotein B (gB) is an essential viral protein that is conserved in all herpesviruses  
43 and is required for virus entry. gB is thought to undergo a conformational change that  
44 provides the energy to fuse the viral and cellular membranes, however the details of  
45 this conformational change and the structure of the prefusion and intermediate  
46 conformations of gB are not known. Previously, we demonstrated that mutations in  
47 the gB “arm” region inhibit fusion and impart a small plaque phenotype. Using serial  
48 passage of a virus carrying these mutations, we identified revertants with restored  
49 plaque size. The revertant viruses acquired novel mutations in gB that restored fusion  
50 function and mapped to two sites in the gB ectodomain. This work supports our  
51 hypothesis that an interaction between the gB arm and the core of gB is critical for gB  
52 refolding and provides details about the function of gB in herpesvirus mediated fusion  
53 and subsequent virus entry.

54

## 55 **INTRODUCTION**

56 Herpes simplex virus (HSV) causes recurrent mucocutaneous lesions on the  
57 mouth, face or genitalia and spread to the central nervous system which can lead to  
58 meningitis or encephalitis (1). Infection of host cells occurs by fusion of the virion  
59 envelope with a cell membrane to deliver the nucleocapsid and the viral genome into  
60 the host cell. HSV entry into cells and virus-induced cell-cell fusion require the  
61 coordinated action of the four viral entry glycoproteins: glycoprotein D (gD), gH, gL, and  
62 gB. The binding of gD to receptor results in a conformational change in gD that is  
63 proposed to signal the gHgL heterodimer to trigger the fusogenic activity of gB (2-4).

64 gB is a trimeric class III viral fusion protein that is conserved across all  
65 herpesviruses (5-7). Upon triggering, gB inserts into the cellular membrane and refolds  
66 from a prefusion to a postfusion conformation to bring the viral and cell membranes  
67 together. The structures of the postfusion forms of gB from three herpesviruses have  
68 been solved (5, 8-10). To date, attempts to capture a stable prefusion form of HSV-1 gB  
69 for crystallization have been unsuccessful (11). Alternative gB conformations have been  
70 modeled recently using cryoelectron tomography of gB present on membranes (12, 13).  
71 A prefusion model of gB has been developed using the crystal structure of the class III  
72 fusion protein from vesicular stomatitis virus (VSV) (14-16).

73 Our previous site-directed mutagenesis study demonstrated that fusion was  
74 impaired by mutations in an extended arm at the C-terminus of the ectodomain (domain  
75 V) that packs against the coiled-coil core of gB (domain III) in the post-fusion  
76 conformation (17). Alanine substitutions in three arm residues (I671A, H681A, and  
77 F683A; termed gB3A in this paper) that were predicted to disrupt interactions between  
78 the arm and coil greatly reduced fusion in a quantitative cell-cell fusion assay, indicating  
79 that the gB arm is important for fusion. Fusion function in gB3A was restored by the  
80 addition of a known hyperfusogenic mutation in the gB cytoplasmic tail, suggesting that  
81 the gB3A mutations did not cause global misfolding of gB. Due to the similarity of this  
82 gB coil-arm complex to the six-helix bundle of class I fusion proteins (18), we  
83 hypothesized that the gB coil-arm interactions were important for the transition from a  
84 prefusion to a postfusion gB conformation.

85 To further investigate the role of the gB arm region in virus entry, we generated  
86 and characterized HSV-1 carrying the gB3A mutations. This gB3A virus had small

87 plaques, impaired growth, and delayed penetration into cells that was restored partially  
88 at elevated temperatures (19). These results supported our hypothesis that the gB3A  
89 mutations alter fusion kinetics by stabilizing a prefusion or intermediate conformation of  
90 gB or destabilizing the postfusion conformation.

91 In the present study, we passaged gB3A virus and selected for large plaque variants  
92 to identify mutations within gB that could restore gB3A fusion function. We selected  
93 three independent revertant viruses and sequencing revealed that all three viruses  
94 acquired mutations in gB. We cloned gB from the revertant viruses and introduced the  
95 mutations into wild-type (WT) gB and gB3A to analyze the effect of these mutations on  
96 cell surface expression and cell-cell fusion activity when coexpressed with WT gD, gH,  
97 and gL. The second-site revertant mutations identified two regions that modulate the  
98 fusion activity of gB3A: the C-terminus of the gB ectodomain and the intersection of  
99 three domains in a model of prefusion gB.

100

## 101 **RESULTS**

102 **Selection of gB3A revertant viruses.** Since gB3A virus exhibited delayed entry  
103 and a small plaque phenotype (19), we used serial passage to select for second-site  
104 mutations that would rescue the gB3A plaque morphology. We hypothesized that the  
105 location of these second-site mutations would reveal gB sites of functional importance,  
106 potentially including residues that affect the stability of gB and/or interact with the  
107 domain V arm region in a prefusion or intermediate gB conformation. Since our previous  
108 study showed that truncating the cytoplasmic tail of gB3A restored its fusion activity

109 (17), we had reason to expect that second site mutations in gB would be able rescue  
110 the gB3A fusion defect.

111 Three independently purified stocks of DNA from a BAC carrying gB3A (pQF297)  
112 (19) were transfected individually into Vero cells expressing Cre recombinase to excise  
113 the BAC backbone. Virus harvested from these cells was amplified in Vero cells to  
114 generate three independent gB3A virus stocks. To select for revertant viruses  
115 possessing a growth advantage linked to a restoration of fusion function, these gB3A  
116 stocks were passaged serially in Vero cells. Virus harvested from each passage was  
117 titered to facilitate calculation of a multiplicity of infection (MOI) of 0.01 for the next  
118 passage. After serial passage, larger plaques were observed during titration and the  
119 infections spread faster in culture than the parental gB3A virus. For example, prior to  
120 passage 15, the gB3A virus stock designated 58621 required 7-15 days between  
121 passages to reach full cytopathic effect (CPE). By passage 20, CPE developed at the  
122 same rate for the 58621 infection and WT infections. By passage 24, the majority of  
123 plaques from the 58621 infection were large.

124 **Large plaque revertant viruses carry mutations in gB.** A single large plaque  
125 revertant was selected from each of the three independently passaged gB3A stocks and  
126 the revertant virus was plaque purified. Viral DNA from the revertant viruses was used  
127 to clone and sequence the gB gene to allow us to examine the effect of gB mutations on  
128 fusion function in the absence of other viral genes that may have acquired mutations  
129 during the serial passaging. Sequencing results revealed that each revertant virus  
130 acquired distinct mutations within gB, including a single mutation A683V (isolated at

131 passage 6), a quadruple mutation S383F/G645R/V705I/A855V (isolated at passage 25),  
132 and a double mutation T509M/N709H (isolated at passage 30).

133 **Fusion restoration in the gB3A-A683V revertant.** The gB3A-A683V revertant  
134 virus demonstrated a larger plaque size than the parental gB3A virus, with a plaque  
135 morphology that resembled WT HSV (Fig. 1). The A683V mutation directly changes one  
136 of the original residues mutated in gB3A. Residue 683 is an alanine in gB3A and a  
137 phenylalanine in WT gB.

138 To assess the impact of the A683V mutation on fusion, the gB gene from this  
139 revertant virus was cloned into an expression vector (gB3A-A683V) with an N-terminal  
140 FLAG tag added to facilitate comparison of expression levels. This valine substitution at  
141 683 also was added to a FLAG-tagged version of WT gB (gB-F683V). A virus-free cell-  
142 cell fusion assay was used to examine mutant gB fusion function. In this assay, one set  
143 of cells expressing T7 polymerase, gD, gH, gL, and version of gB is cocultured with a  
144 second set of cells expressing with an HSV receptor and luciferase under the control of  
145 the T7 promoter. Luciferase expression is used to quantify cell-cell fusion. As we  
146 previously reported, gB3A mediated nearly undetectable fusion (Fig. 2) (17). gB3A-  
147 A683V partially restored fusion, compared to gB3A, consistent with the restoration of  
148 plaque size exhibited by the revertant virus. gB-F683V showed reduced fusion  
149 compared to WT gB, indicating that, although a valine is functional in this position, a  
150 phenylalanine at this position promotes greater fusion. Interestingly, FLAG-tagged gB3A  
151 showed impaired cell surface expression compared to FLAG-tagged WT gB (Fig. 2).  
152 This effect on gB3A expression was unexpected because the FLAG-tagged WT gB and  
153 untagged WT gB have similar levels of surface expression (data not shown). The

154 addition of the A683V mutation to FLAG-tagged gB3A restored expression, which may  
155 partially account for restoration of fusion function.

156 **Fusion restoration in the gB3A-S383F/G645R/V705I/A855V revertant.** The  
157 gB3A-S383F/G645R/V705I/A855V revertant virus demonstrated a larger plaque size  
158 than the parental gB3A virus, with a plaque morphology that resembles a syncytial virus  
159 (Fig. 1). This morphology agrees with previous work that identified gB-A855V as a  
160 syncytial mutation (20, 21).

161 The gB gene from this quadruple mutant was cloned into the same expression  
162 vector as above (gB3A-S383F/G645R/V705I/A855V) to assay the effect of these  
163 mutations on cell-cell fusion and cell surface expression. The revertant gB carrying the  
164 four second-site mutations exhibited nearly WT levels of both cell surface expression  
165 and fusion (Fig. 3A). This restoration of fusion is consistent with restored plaque size of  
166 the revertant virus. As with the A683V mutant, the effect of the second-site mutations on  
167 the surface expression of FLAG-gB3A may contribute to enhanced fusion.

168 Sequencing the gB gene from earlier passages of this revertant virus that were  
169 not plaque purified showed that the G645R and A855V mutations (present at passage  
170 8) appeared before the S383F mutation (present at passage 10) and that the V705I  
171 mutation appeared last (present in the final passage 25).

172 To examine how the four amino acid changes in the revertant virus may  
173 contribute to the restoration of plaque size, the mutations were introduced into gB singly  
174 or in combination. The four mutations were introduced individually into FLAG-tagged  
175 WT gB or gB3A. Then the four second-site mutations present in the revertant gB



176 construct were mutated individually back to their corresponding WT residues. Four  
177 additional double mutations were also generated in the gB3A background.

178 Introduction of any one of the second-site mutations into WT gB did not affect the  
179 cell surface expression levels (Fig. 3A). As expected, A855V enhanced cell-cell fusion  
180 when added to WT gB (Fig. 3A, column 8). The A855V mutation was shown previously  
181 to enhance cell-cell fusion (22, 23). Individual introduction of the other three second-site  
182 mutations into WT gB enhanced fusion only modestly.

183 The addition of S383F or G645R to gB3A did not alter cell surface expression or  
184 fusion substantially. The addition of A855V to gB3A enhanced fusion to greater than WT  
185 levels (Fig. 3A, column 12), similar to the results observed in the WT gB background.  
186 Interestingly, V705I enhanced both gB3A cell surface expression and fusion (Fig. 3A,  
187 column 11).

188 When the second-site mutations present in gB3A-S383F/G645R/V705I/A855V  
189 were restored individually to the corresponding WT gB residues, loss of the A855V  
190 mutation resulted in greatly reduced fusion levels (Fig. 3A, column 16), as expected.  
191 Loss of the V705I mutation modestly reduced both expression and fusion (column 15).  
192 Loss of either the S383F or G645R second-site mutations (columns 13-14) did not  
193 impact expression levels, but surprisingly fusion was enhanced compared to the  
194 revertant protein carrying all four mutations (column 4). This finding suggests that  
195 S383F or G645R independently dampen fusion mediated by this revertant gB.

196 To further examine the role of these second-site mutations, four gB3A constructs  
197 carrying double mutations were created (Fig. 3A). The gB3A construct carrying both the  
198 V705I and A855V mutations showed the highest levels of fusion (Fig. 3A, column 20),

199 higher than those observed when A855V was added to gB3A alone (column 12),  
200 suggesting that V705I promotes fusion in addition to A855V. A comparison of gB3A-  
201 V705I/A855V (column 20) with the revertant carrying all four mutations (column 4)  
202 confirms that S383F and G645R dampen fusion in this revertant. Similarly, a dampening  
203 effect of S383F on fusion is apparent when comparing gB3A-S383F/A855V (column 19)  
204 with gB3A-A855V (column 12) or gB3A-S383F/V705I (column 17) with gB3A-V705I  
205 (column 11).

206 **Fusion restoration in the gB3A-T509M/N709H revertant.** The gB3A-  
207 T509M/N709H revertant virus demonstrated larger plaques than the parental gB3A  
208 virus, with a plaque morphology resembling WT HSV (Fig. 1). Both of these mutations  
209 are in the gB ectodomain and neither were previously reported to be hyperfusogenic.  
210 Interestingly, in the postfusion structure of gB, T509 is a contact residue for F683,  
211 located in the central trimeric coiled-coil. To examine the impact of these mutations on  
212 gB expression and fusion, the gB gene from this virus was cloned into the same  
213 expression vector as above (gB3A-T509M/N709H). The addition of these two mutations  
214 to gB3A enhanced fusion (Fig. 4), consistent with the larger plaque phenotype of this  
215 virus. As with the previous two revertant gB constructs, the expression of the revertant  
216 gB was enhanced compared to FLAG-gB3A, which may contribute to improved fusion  
217 function. When the mutations were added individually to WT gB, neither mutation  
218 enhanced fusion (Fig. 4), indicating that these mutations are not hyperfusogenic like  
219 A855V. In fact, both of the mutations somewhat decreased fusion mediated by WT gB.  
220 When the mutations were added individually to gB3A, no fusion was detected (Fig. 4),  
221 indicating that neither mutation alone can rescue the fusion defect imparted by gB3A.

222 The mutations act in combination to restore fusion mediated by gB3A and are of  
223 particular interest because they have not been previously described and they map to  
224 two sites in the prefusion and postfusion gB structures that correspond with the gB3A-  
225 S383F/G645R/V705I/A855V revertant.

226

## 227 **DISCUSSION**

228 The gB3A mutations (I671A/H681A/F683A) were designed based on the  
229 postfusion structure of gB (5) to reduce interactions between the domain V arm and the  
230 central coiled-coil (17). We previously showed that these mutations inhibited cell-cell  
231 fusion and virus carrying these mutations exhibited a growth defect and formed 200-fold  
232 smaller plaques than WT virus (19). To investigate how these gB3A mutations inhibit  
233 fusion, we serially passaged BAC-derived gB3A virus to select for mutations that  
234 overcome the fusion defect and restore a larger plaque size. Three revertant viruses  
235 were isolated and all three viruses carried mutations in gB3A.

236 To examine whether the newly acquired mutations in gB3A could account for the  
237 restored plaque size, we cloned the gB genes from these viruses into expression  
238 vectors. The second-site mutations enhanced gB3A cell-cell fusion, suggesting that  
239 these mutations were responsible for the larger plaque size. Thus, natural selection  
240 identified several second-site gB mutations that restore gB3A function. Although  
241 additional mutations outside of gB also may have contributed to the restored plaque  
242 size and/or growth of the revertant viruses, cloning the revertant gB genes allowed us to  
243 analyze the effect of the gB mutations in isolation when coexpressed with WT gD, gH,  
244 and gL.

245           The gB3A-A683V virus acquired a change in residue 683, one of the residues  
246 originally mutated to alanine in gB3A. Selection of this revertant mutation underscores  
247 the importance of residue 683 to gB fusion function and demonstrates that, although in  
248 WT residue 683 is a phenylalanine, a valine at this position is sufficient to promote  
249 fusion better than alanine, an amino acid with a smaller side-chain (Fig. 2A).

250           This A683V mutation was selected independently twice upon serial passage of  
251 gB3A virus (data not shown). Interestingly, among the three original mutation sites,  
252 A683 was the only one changed. In postfusion WT gB, I671, H681, and F683 pack  
253 against the central coiled-coil of gB (Fig. 3B). The selection pressure for a substitution  
254 at gB3A A683 rather than A681 can be explained by the structure, but the reason an  
255 A683V mutation was selected over a revertant substitution in I671 is unclear. I671 and  
256 F683 contact the coil more extensively than H681, with I671 and F683 contacting six  
257 and five coil residues, respectively, whereas H681 contacts only three coil residues (5).  
258 The side-chain atoms of I671 and F683 make 14 and 13 contacts with the coil,  
259 respectively, whereas the side-chain atoms of H681 make only seven contacts. The  
260 specific importance of I671 and F683 was apparent when we previously showed that  
261 individually mutating F683 or I671 alanine impairs fusion more than mutating H681 (17).

262           The gB3A-S383F/G645R/V705I/A855V virus retained the original three alanine  
263 mutations and acquired four additional mutations, including A855V, a known  
264 hyperfusogenic mutation located in the cytoplasmic tail of gB (22). By analyzing  
265 individual mutations, we confirmed that A855V alone enhances both gB3A and WT gB  
266 fusion (Fig. 3A). A855V and G645R mutations were the first mutations acquired in the  
267 revertant virus, present by passage 8. The larger plaque phenotype was apparent at

268 this early passage, consistent with A855V being primarily responsible for the large  
269 plaque phenotype. The structure of the gB cytoplasmic tail was solved recently (24) and  
270 it forms a trimer that is proposed to stabilize prefusion gB, functioning as a clamp.  
271 Residue 855 lies within a long helix that angles upwards toward the membrane.  
272 Mutation of this residue may enhance fusion by weakening the trimerization of the  
273 cytoplasmic domain. Alternatively, this residue is on the periphery of the cytoplasmic  
274 domain and it could serve as a site of interaction with the gH cytoplasmic tail (24).

275 Interestingly, S383F or G645R independently appear to dampen fusion. This may  
276 seem counterintuitive initially, however maximal levels of fusion do not correlate  
277 necessarily with maximal titers. For example, virus complemented with hyperfusogenic  
278 gB yields lower viral titers than WT gB (17, 25, 26). The S383F and G645R mutations  
279 may provide a selective advantage to the revertant virus by preserving infectious virus  
280 production in the presence of the hyperfusogenic A855V mutation and the boosting titer  
281 of this virus. Although S383 and G645 are far apart in the postfusion structure of gB  
282 (Fig. 3B), they are located close to one another in a prefusion model of gB (Fig. 3C)  
283 (14), is based on the prefusion structure of the VSV fusion protein (15). S383 and G645  
284 sit at the intersection of domains II, III, and IV, suggesting the possibility that mutations  
285 in these residues impact interdomain interactions that stabilize prefusion gB.

286 G645 lies in the middle of a stretch of three glycines. Recently, a mutation very  
287 similar to G645R was selected by serial passage of a gL-null pseudorabies virus (PRV)  
288 strain (27). gL-null PRV can spread cell-to-cell and passage of this virus selected for  
289 several second site mutations, including PRV gB G672R. This PRV gB mutation lies in  
290 a residue that corresponds to the HSV-1 gB glycine immediately adjacent to G645. PRV

291 gB G672R was shown to be a modestly hyperfusogenic mutation when added to WT  
292 PRV gB.

293 In the postfusion gB structure, S383 maps in the same plane as residues H681  
294 and F683 (Fig. 3B), presenting the possibility that replacing this small polar serine with a  
295 large hydrophobic phenylalanine may impact local interactions and alter how the arm  
296 packs against the coiled-coil in gB3A.

297 The V705I mutation enhanced surface expression levels, restoring the gB3A  
298 expression defect (Fig. 3A). Greater surface expression may account for some of the  
299 restoration of fusion function observed when V705I was added to gB3A. V705I also  
300 appears to boost to gB3A fusion function directly, since the addition of V705I/A855V to  
301 gB3A resulted in greater levels of fusion than the addition of A855V alone, despite  
302 similar levels of surface expression for both constructs (Fig. 3A, columns 12 and 20).  
303 V705I does not impact WT gB function, indicating that the addition of this larger  
304 hydrophobic side chain enhances gB3A fusion in a specific manner. Interestingly, the  
305 revertant virus acquired the V705I mutation after the other three mutations. The addition  
306 of V705I boosts cell-cell fusion activity compared to gB3A-S383F/G645R/A855V (Fig.  
307 3A, columns 4 and 15), bringing it to the WT gB levels, potentially the optimal level for  
308 virus replication. V705 lies in domain V of gB, downstream from the three alanine  
309 mutations. In the postfusion structure of gB, V705 enters the core of domain I, the  
310 domain that includes the fusion loops and interacts with the host cell membrane (Fig.  
311 3B). Mutation of V705 may influence the conformation of domain I or the refolding of  
312 gB3A into a postfusion conformation.

313 Like the quadruple mutant revertant virus, the gB3A-T509M/N709H revertant  
314 virus also retained the original three alanine mutations and acquired additional  
315 mutations that restored fusion function. Unlike the previous revertant, both T509M and  
316 N709H were required to restore gB3A function and neither mutation was  
317 hyperfusogenic in WT gB background. Remarkably, N709 is located near V705 in the  
318 postfusion structure (Fig. 4B), in the portion of domain V that penetrates domain I. The  
319 location of this mutation supports the importance of this region for gB fusion function.  
320 Similar to V705I, N709H enhanced gB3A expression specifically, suggesting a specific  
321 effect of this region on the gB3A structure.

322 T509 is a contact residue for F683 and is located in the central trimeric coiled-coil  
323 of postfusion gB (Fig. 4B). Although T509M did not restore gB3A fusion on its own, the  
324 substitution of a larger hydrophobic side chain at this position may partially restore an  
325 interaction between the gB arm and coil. Strikingly, in the prefusion gB model, T509 lies  
326 in at the intersection of domains II, III, and IV (Fig. 4C), near the location of S383 and  
327 G645 (Fig. 3C). Thus, mutations in this region were selected independently in two  
328 revertant viruses, suggesting that the interdomain interactions at this site may impact gB  
329 refolding during fusion.

330 We hypothesized that an interaction between the arm and coil regions of gB is  
331 important for gB refolding and we demonstrated that fusion is impeded by gB3A  
332 mutations that were designed to disrupt that interaction. Using *in vitro* evolution to select  
333 revertant viruses, we identified two gB regions that influence gB3A, including the C-  
334 terminal region of domain V in postfusion gB (residues I705 and N709) and the  
335 intersection of domains II, III, and IV in prefusion gB (residues S383, G645, and T509).

336 Mutations at these residues may compensate for the gB3A fusion defect by  
337 destabilizing gB3A to reduce a kinetic barrier to fusion and/or enhancing gB expression.  
338 To investigate how other viral proteins regulate and/or trigger gB fusion activity, future  
339 work will select for revertant mutations outside of gB by passaging gB3A virus in cells  
340 that express gB3A as a cellular protein.

341

## 342 **MATERIALS AND METHODS**

343 **Cells and antibodies.** Chinese hamster ovary (CHO-K1; American Type Culture  
344 Collection (ATCC, USA)) cells were grown in Ham's F12 medium supplemented with  
345 10% fetal bovine serum (FBS) (ThermoFisher Scientific, USA). Vero cells (ATCC, USA)  
346 and Vero-cre cells that express Cre recombinase (kindly provided by Dr. Gregory Smith  
347 at Northwestern University) were grown in Dulbecco modified Eagle medium (DMEM)  
348 supplemented with 10% FBS, penicillin and streptomycin. The anti-FLAG MAb F1804  
349 (Sigma) was used to assay cell surface expression.

350 **Plasmids and BACs.** Previously described plasmids expressing HSV-1 KOS  
351 strain gB (pPEP98), gD (pPEP99), gH (pPEP100) and gL (pPEP101) (28), as well as  
352 nectin-1 (pBG38) (Geraghty et al, 1998) and HVEM (pBEC10) (29), were provided by  
353 Dr. Spear at Northwestern University. Plasmid pQF112 encodes an N-terminally FLAG-  
354 tagged version of WT HSV-1 gB (FLAG-gB) (30). Previously described BACs used in  
355 this study include a WT HSV-1 strain F BAC (GS3217; kindly provided by Dr. Gregory  
356 Smith, Northwestern University) and a BAC derived from GS3217 that encodes gB3A  
357 (pQF297) (19). Both BACs carry the red fluorescence protein (RFP) TdTomato under a  
358 cytomegalovirus promoter.



359 For this study, all gB mutants were cloned into the pFLAG-myc-CMV-21  
360 expression vector (E5776; Sigma), substituting the gB signal sequence and adding an  
361 N-terminal FLAG epitope. A FLAG-tagged gB3A construct with gB3A mutations  
362 (I671A/H681A/F683A; pQF302) was subcloned from pSG5-HSVgB-  
363 I671A/H681A/F683A (17). Three revertant gB constructs were generated by amplifying  
364 the gB gene from viral DNA isolated using a DNeasy Blood and Tissue Kit (Qiagen,  
365 USA), including I671A/H681A/F683V (pQF338),  
366 I671A/H681A/F683A/S383F/G645R/V701I/A855V (pQF343), and  
367 I671A/H681A/F683A/T509M/N709H (pQF339). Quikchange site-directed mutagenesis  
368 (ThermoFisher Scientific, USA) was used to introduce specific mutations into FLAG-  
369 tagged gB3A (pQF302), including S383F (pQF319), G645R (pQF320), V705I (pQF321),  
370 A855V (pQF322), S383F/V705I (pQF328), G645R/V705I (pQF327), S383F/A855V  
371 (pQF324), V705I/A855V (pQF325). The mutant constructs G645R/V701I/A855V  
372 (pQF309), S383F/V705I/A855V (pQF310), S383F/G645R/A855V (pQF311), and  
373 S383F/G645R/V705I (pQF312) were created by using Quikchange on pQF343.  
374 Quikchange also was used to introduce mutations into FLAG-tagged WT gB (pQF112),  
375 including S383F (pQF305), G645R (pQF306), V705I (pQF307), A855V (pQF309),  
376 T509M (pQF367), and N709H (pQF369), and F683V (pQF368). The gB open reading  
377 frame was verified by sequencing for all clones.

378 **Virus stocks created from BAC DNA.** WT HSV-1 BAC DNA (GS3217) and  
379 three independent stocks of gB3A virus BAC DNA (pQF297) were purified. The BAC  
380 DNA was transfected using Lipofectamine 2000 (Invitrogen, Carlsbad, CA) into Vero  
381 cells expressing Cre recombinase to excise the LoxP flanked BAC backbone, as

382 previously described (19). The transfected cells were harvested and sonicated after one  
383 week for the WT BAC and three weeks for the gB3A BAC samples, based on when the  
384 majority of cells showed RFP expression. The harvested stocks were passaged once on  
385 Vero cells in roller bottles to generate virus stocks, including a WT stock and three  
386 independent gB3A stocks designated 58621, 57621, and 58632. For 58632, the virus  
387 stock was purified using three rounds of plaque purification using limiting dilution in 96  
388 well plates.

389 **Selection of gB3A-revertant viruses.** Vero cells were infected with the gB3A  
390 virus stocks at an MOI of 0.01. When full disruption of the monolayer by CPE was  
391 observed, cells were harvested and sonicated to create a virus stock. Virus then was  
392 reseeded on Vero cells at an MOI of 0.01 for serial passage. For the gB3A stocks  
393 57621 and 58621, virus was passaged in 6 well plates for 18 passages and then  
394 passaged in roller bottles. For gB3A stock 58632, virus was passaged directly in roller  
395 bottles. Virus stocks were titered at each passage to facilitate calculation of an MOI of  
396 0.01 for the next passage. When the titering step revealed large plaques, virus from a  
397 single large plaque was purified through three rounds of plaque purification using  
398 limiting dilution in 96-well plate. Prior to the emergence of larger plaques, each gB3A  
399 virus passage took 14-21 days. After larger plaques were observed, full CPE was  
400 achieved at 3-4 days post-infection, similar to a WT virus infection. The gB gene from  
401 larger plaque (revertant) virus stocks was sequenced. At passage 6, a 58632 revertant  
402 virus carrying the gB mutation A683V was isolated. At passage 25, a 58621 revertant  
403 virus carrying gB mutations S383F/G645R/V705I/A855V was isolated. At passage 30, a  
404 57621 revertant virus carrying gB mutations T509M/N709H was isolated.

405           **Microscopy of plaque morphology.** Plaques were visualized using Giemsa  
406 (Sigma-Aldrich, USA) staining after 3 days of infection and imaged with transmitted light  
407 microscopy using EVOS Cell Imaging Systems at 4x.

408           **Cell-cell fusion assay.** The fusion assay was performed as previously described  
409 (28). Briefly, CHO-K1 cells were seeded in 6-well plates overnight. One set of cells  
410 (effector cells) were transfected with 400 ng each of plasmids encoding T7 RNA  
411 polymerase, gD, gH, gL, and either a gB construct or empty vector, using 5  $\mu$ l of  
412 Lipofectamine 2000 (Invitrogen, USA). A second set of cells (target cells) was  
413 transfected with 400 ng of a plasmid encoding the firefly luciferase gene under control of  
414 the T7 promoter and 1.5  $\mu$ g of either receptor (HVEM or nectin-1) or empty vector, using  
415 5  $\mu$ L of Lipofectamine 2000. After 6 h of transfection, the cells were detached with  
416 versene and resuspended in 1.5 mL of F12 medium supplemented with 10% FBS.  
417 Effector and target cells were mixed in a 1:1 ratio and re-plated in 96-well plates for 18  
418 h. Luciferase activity was quantified using a luciferase reporter assay system (Promega)  
419 and a Wallac-Victor luminometer (Perkin Elmer).

420           **Cell-based ELISA (CELISA).** To evaluate the cell surface expression of gB  
421 mutants, CHO-K1 cells seeded in 96-well plates were transfected with 60 ng of empty  
422 vector or a gB construct using 0.15  $\mu$ l of Lipofectamine 2000 (Invitrogen) diluted in Opti-  
423 MEM (Invitrogen). After 24 h, the cells were rinsed with phosphate buffered saline  
424 (PBS) and CELISA staining was performed as previously described (31), using the  
425 primary anti-FLAG MAb F1804. After incubation with primary antibody, the cells were  
426 washed, fixed, and incubated with biotinylated goat anti-mouse IgG (Sigma), followed  
427 by streptavidin-HRP (GE Healthcare) and HRP substrate (BioFX).

428

## 429 **ACKNOWLEDGMENTS**

430 We thank Dr. Gregory Smith for providing us with the HSV-1 BAC GS3217 and Dr.  
431 Yasushi Kawaguchi for providing the parental BAC. We thank Nan Susmarski for timely  
432 and excellent technical assistance and members of the Longnecker laboratory for their  
433 help in these studies. Sequencing services were performed at the Northwestern  
434 University Genomics Core Facility. R.L. is the Dan and Bertha Spear Research  
435 Professor in Microbiology-Immunology. This work was supported by NIH grant  
436 CA021776 to R.L.

437

438

## 439 **FIGURE LEGENDS**

440 Fig. 1. Plaque size and morphology of gB3A-revertant viruses. Vero cells were infected  
441 with BAC-derived WT HSV (GS3217), gB3A virus, or gB3A-revertant viruses (A683V,  
442 F383S/G645R/V705I/A855V, or T509M/N709H) at an MOI of 0.01. Three days post-  
443 infection, cells were stained and imaged at 4X magnification. gB3A plaques (white  
444 arrow) are compared to those of WT and revertant viruses (black arrows).

445

446 Fig. 2. Expression of and fusion mediated by gB mutants constructs. gB residue 683  
447 was mutated to valine in FLAG-tagged constructs of WT gB and gB3A. CHO-K1 cells  
448 (effector cells) were transfected with plasmids encoding T7 polymerase, gD, gH, and gL,  
449 plus either a version of gB or empty vector. Another set of CHO-K1 cells (target cells)  
450 was transfected with a plasmids encoding the luciferase gene under the control of the

451 T7 promoter and either nectin-1 or HVEM receptor. One set of effector cells was used to  
452 determine cell surface expression of gB by CELISA using a MAb specific for the FLAG  
453 tag (white bars). Two duplicate sets of effector cells were co-cultured with the target  
454 cells expressing nectin-1 (gray bars) or HVEM (black bars) and luciferase activity was  
455 assayed as measure of cell-cell fusion activity. The results are expressed as a  
456 percentage of wild-type FLAG-gB expression or fusion activity, after subtracting  
457 background values measured in the absence gB expression (vector). The means and  
458 standard deviations of at least three independent experiments are shown.

459

460 Fig. 3. Expression of and fusion mediated by gB mutant constructs derived from gB3A-  
461 S383F/G645R/V705I/A855V. (A) gB mutations were added to FLAG-tagged WT gB or  
462 gB3A constructs, as indicated. Cell surface expression (white bars) and fusion activity  
463 (gray and black bars) of the gB constructs were assayed as in Fig. 2. Column sets are  
464 numbers above the graph. (B) Location of the mutated residues on postfusion gB. The  
465 crystal structure of the ectodomain of postfusion gB (PDB ID 2GUM) is shown, with  
466 five domains colored, including DI (blue), DII (green), DIII (yellow), DIV (orange), and  
467 DV (red). The three residues mutated in DV of gB3A are shown (red spheres). Three of  
468 the mutations selected in the gB3A revertant are shown, including S383 (dark blue  
469 spheres), G645 (magenta spheres), and V705 (cyan spheres). A855 is not shown  
470 because it is located in the gB cytoplasmic tail. (C) Location of mutated residues on a  
471 model of prefusion gB. A model of the prefusion gB ectodomain is shown (14), with four  
472 domains colored as in part B. DV and the cytoplasmic tail are not present in the model,  
473 thus the residues mutated in DV of gB3A, V705, and A855 are not shown.

474

475 Fig. 4. Expression of and fusion mediated by gB mutant constructs derived from gB3A-  
476 T509M/N709H. (A) gB mutations were added to FLAG-tagged WT gB or gB3A  
477 constructs, as indicated. Cell surface expression (white bars) and fusion activity (gray  
478 and black bars) of the gB constructs were assayed as in Fig. 2. (B) Location of mutated  
479 residues on postfusion gB. The structure of postfusion gB (PDB ID 2GUM) is shown,  
480 with the gB3A mutated residues (red spheres) and five domains colored as in Fig. 3B.  
481 The two mutations selected in the gB3A revertant are shown, including T509 (dark blue  
482 spheres) and N709 (cyan spheres). (C) Location of mutated residues on a model of  
483 prefusion gB. A model of prefusion gB is shown (14), with domains colored as in Fig.  
484 2C. T509 (blue spheres) is shown. DV is not present in the model, thus N709 is not  
485 shown.

## 486 REFERENCES

- 487 1. **Roizman B.** 1993. The family herpesviridae, p 1-9. *In* Roizman B, Whitley RJ,  
488 Lopez C (ed), The Human Herpesviruses. Raven Press Ltd., New York.
- 489 2. **Connolly SA, Jackson JO, Jardetzky TS, Longnecker R.** 2011. Fusing  
490 structure and function: a structural view of the herpesvirus entry machinery. *Nat*  
491 *Rev Microbiol* **9**:369-381.
- 492 3. **Eisenberg RJ, Atanasiu D, Cairns TM, Gallagher JR, Krummenacher C,**  
493 **Cohen GH.** 2012. Herpes virus fusion and entry: a story with many characters.  
494 *Viruses* **4**:800-832.
- 495 4. **Stampfer SD, Heldwein EE.** 2013. Stuck in the middle: structural insights into  
496 the role of the gH/gL heterodimer in herpesvirus entry. *Curr Opin Virol* **3**:13-19.

- 497 5. **Heldwein EE, Lou H, Bender FC, Cohen GH, Eisenberg RJ, Harrison SC.**  
498 2006. Crystal structure of glycoprotein B from herpes simplex virus 1. *Science*  
499 **313**:217-220.
- 500 6. **Cooper RS, Heldwein EE.** 2015. Herpesvirus gB: A Finely Tuned Fusion  
501 Machine. *Viruses* **7**:6552-6569.
- 502 7. **Backovic M, Jardetzky TS.** 2009. Class III viral membrane fusion proteins. *Curr*  
503 *Opin Struct Biol* **19**:189-196.
- 504 8. **Backovic M, Longnecker R, Jardetzky TS.** 2009. Structure of the Epstein-Barr  
505 virus glycoprotein B. *Proc Natl Acad Sci USA* **Accepted**.
- 506 9. **Burke HG, Heldwein EE.** 2015. Correction: Crystal Structure of the Human  
507 Cytomegalovirus Glycoprotein B. *PLoS Pathog* **11**:e1005300.
- 508 10. **Chandramouli S, Ciferri C, Nikitin PA, Calo S, Gerrein R, Balabanis K,**  
509 **Monroe J, Hebner C, Lilja AE, Settembre EC, Carfi A.** 2015. Structure of  
510 HCMV glycoprotein B in the postfusion conformation bound to a neutralizing  
511 human antibody. *Nat Commun* **6**:8176.
- 512 11. **Vitu E, Sharma S, Stampfer SD, Heldwein EE.** 2013. Extensive mutagenesis of  
513 the HSV-1 gB ectodomain reveals remarkable stability of its postfusion form. *J*  
514 *Mol Biol* **425**:2056-2071.
- 515 12. **Zeev-Ben-Mordehai T, Vasishtan D, Hernandez Duran A, Vollmer B, White P,**  
516 **Prasad Pandurangan A, Siebert CA, Topf M, Grunewald K.** 2016. Two distinct  
517 trimeric conformations of natively membrane-anchored full-length herpes simplex  
518 virus 1 glycoprotein B. *Proc Natl Acad Sci U S A* **113**:4176-4181.

- 519 13. **Fontana J, Atanasiu D, Saw WT, Gallagher JR, Cox RG, Whitbeck JC,**  
520 **Brown LM, Eisenberg RJ, Cohen GH.** 2017. The Fusion Loops of the Initial  
521 Prefusion Conformation of Herpes Simplex Virus 1 Fusion Protein Point Toward  
522 the Membrane. *MBio* **8**.
- 523 14. **Gallagher JR, Atanasiu D, Saw WT, Paradisgarten MJ, Whitbeck JC,**  
524 **Eisenberg RJ, Cohen GH.** 2014. Functional Fluorescent Protein Insertions in  
525 Herpes Simplex Virus gB Report on gB Conformation before and after Execution  
526 of Membrane Fusion. *Plos Pathogens* **10**.
- 527 15. **Roche S, Rey FA, Gaudin Y, Bressanelli S.** 2007. Structure of the Prefusion  
528 Form of the Vesicular Stomatitis Virus Glycoprotein G. *Science* **315**:843-848.
- 529 16. **Backovic M, Longnecker R, Jardetzky TS.** 2009. Structure of a trimeric variant  
530 of the Epstein-Barr virus glycoprotein B. *Proc Natl Acad Sci U S A* **106**:2880-  
531 2885.
- 532 17. **Connolly SA, Longnecker R.** 2012. Residues within the C-terminal arm of the  
533 herpes simplex virus 1 glycoprotein B ectodomain contribute to its refolding  
534 during the fusion step of virus entry. *J Virol* **86**:6386-6393.
- 535 18. **White JM, Delos SE, Brecher M, Schornberg K.** 2008. Structures and  
536 mechanisms of viral membrane fusion proteins: multiple variations on a common  
537 theme. *Crit Rev Biochem Mol Biol* **43**:189-219.
- 538 19. **Fan Q, Kopp SJ, Connolly SA, Longnecker R.** 2017. Structure-Based  
539 Mutations in the Herpes Simplex Virus 1 Glycoprotein B Ectodomain Arm Impart  
540 a Slow-Entry Phenotype. *MBio* **8**.



- 541 20. **Engel JP, Boyer EP, Goodman JL.** 1993. Two novel single amino acid syncytial  
542 mutations in the carboxy terminus of glycoprotein B of herpes simplex virus type  
543 1 confer a unique pathogenic phenotype. *Virology* **192**:112-120.
- 544 21. **Haanes EJ, Nelson CM, Soule CL, Goodman JL.** 1994. The UL45 gene  
545 product is required for herpes simplex virus type 1 glycoprotein B-induced cell  
546 fusion. *J Virol* **68**:5825-5834.
- 547 22. **Silverman JL, Greene NG, King DS, Heldwein EE.** 2012. Membrane  
548 requirement for folding of the herpes simplex virus 1 gB cytodomain suggests a  
549 unique mechanism of fusion regulation. *J Virol* **86**:8171-8184.
- 550 23. **Baghian A, Huang L, Newman S, Jayachandra S, Kousoulas KG.** 1993.  
551 Truncation of the carboxy-terminal 28 amino acids of glycoprotein B specified by  
552 herpes simplex virus type 1 mutant amb1511-7 causes extensive cell fusion.  
553 *J Virol* **67**:2396-2401.
- 554 24. **Cooper RS, Georgieva ER, Borbat PP, Freed JH, Heldwein EE.** 2018.  
555 Structural basis for membrane anchoring and fusion regulation of the herpes  
556 simplex virus fusogen gB. *Nat Struct Mol Biol* **25**:416-424.
- 557 25. **Fan Z, Grantham ML, Smith MS, Anderson ES, Cardelli JA, Muggeridge MI.**  
558 2002. Truncation of herpes simplex virus type 2 glycoprotein B increases its cell  
559 surface expression and activity in cell-cell fusion, but these properties are  
560 unrelated. *J Virol* **76**:9271-9283.
- 561 26. **Ruel N, Zago A, Spear PG.** 2006. Alanine substitution of conserved residues in  
562 the cytoplasmic tail of herpes simplex virus gB can enhance or abolish cell fusion  
563 activity and viral entry. *Virology* **346**:229-237.

- 564 27. **Schroter C, Vallbracht M, Altenschmidt J, Kargoll S, Fuchs W, Klupp BG,**  
565 **Mettenleiter TC.** 2015. Mutations in Pseudorabies Virus Glycoproteins gB, gD,  
566 and gH Functionally Compensate for the Absence of gL. *J Virol* **90**:2264-2272.
- 567 28. **Pertel P, Fridberg A, Parish ML, Spear PG.** 2001. Cell fusion induced by  
568 herpes simplex virus glycoproteins gB, gD, and gH-gL requires a gD receptor but  
569 not necessarily heparan sulfate. *Virology* **279**:313-324.
- 570 29. **Montgomery RI, Warner MS, Lum BJ, Spear PG.** 1996. Herpes simplex virus-1  
571 entry into cells mediated by a novel member of the TNF/NGF receptor family.  
572 *Cell* **87**:427-436.
- 573 30. **Fan Q, Longnecker R, Connolly SA.** 2014. Substitution of herpes simplex virus  
574 1 entry glycoproteins with those of saimiriine herpesvirus 1 reveals a gD-gH/gL  
575 functional interaction and a region within the gD profusion domain that is critical  
576 for fusion. *Journal of virology* **88**:6470-6482.
- 577 31. **Lin E, Spear PG.** 2007. Random linker-insertion mutagenesis to identify  
578 functional domains of herpes simplex virus type 1 glycoprotein B. *Proc Natl Acad*  
579 *Sci USA* **104**:13140-13145.
- 580

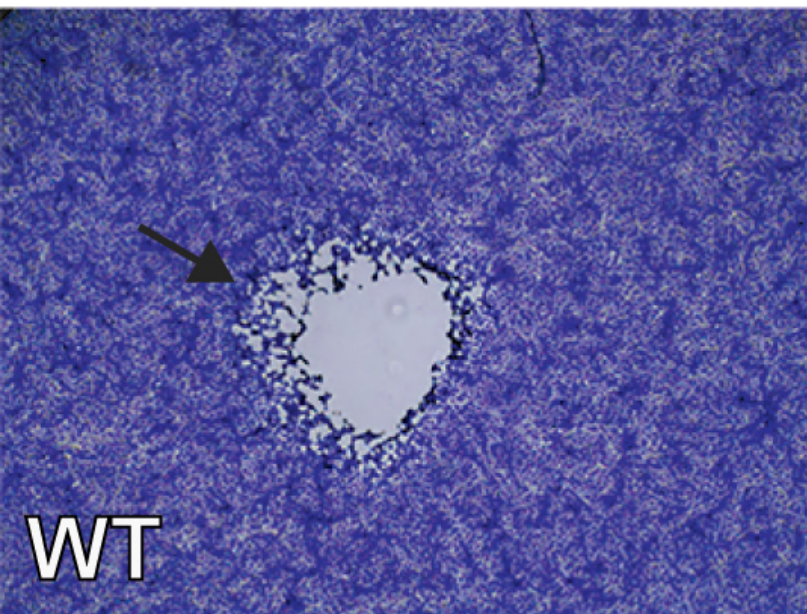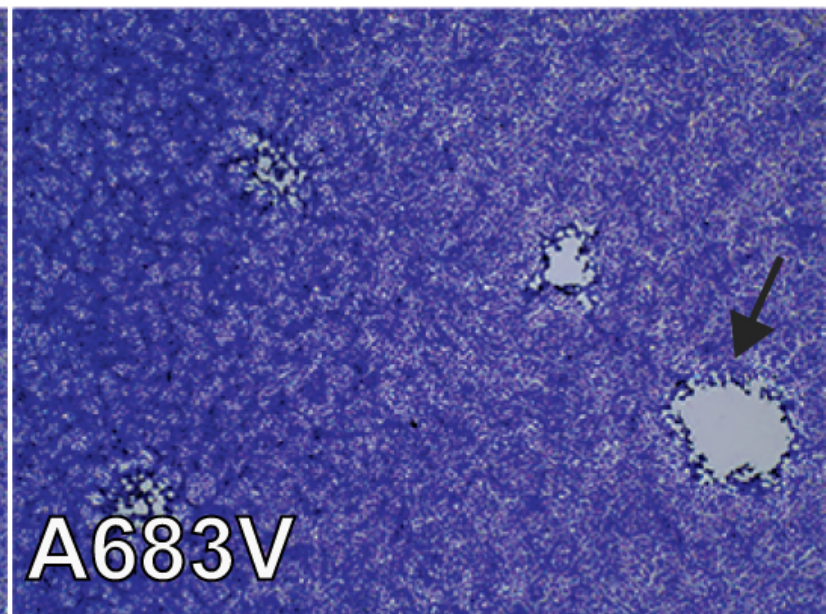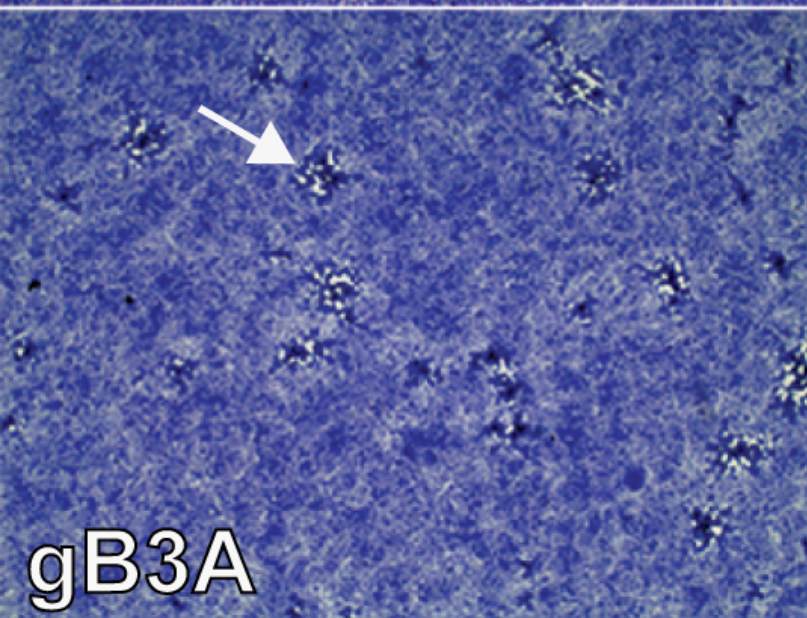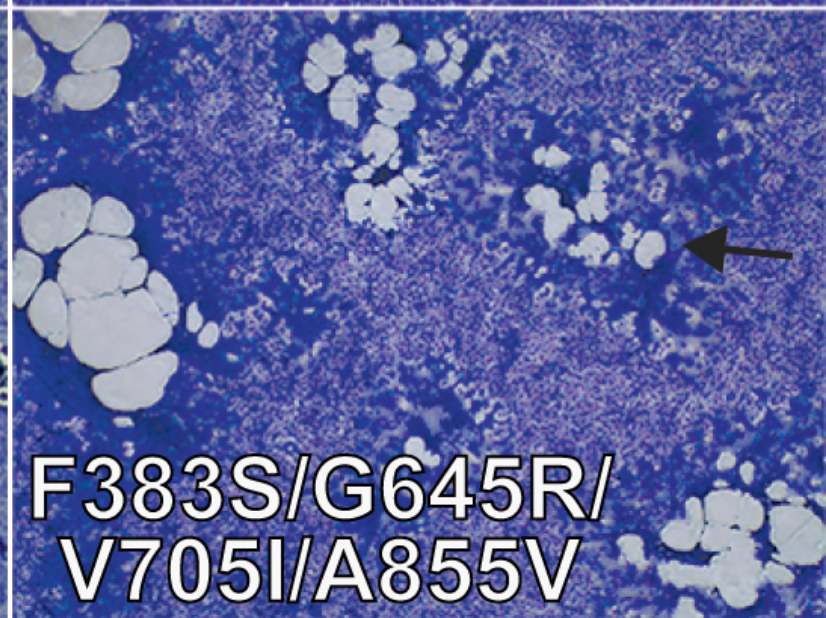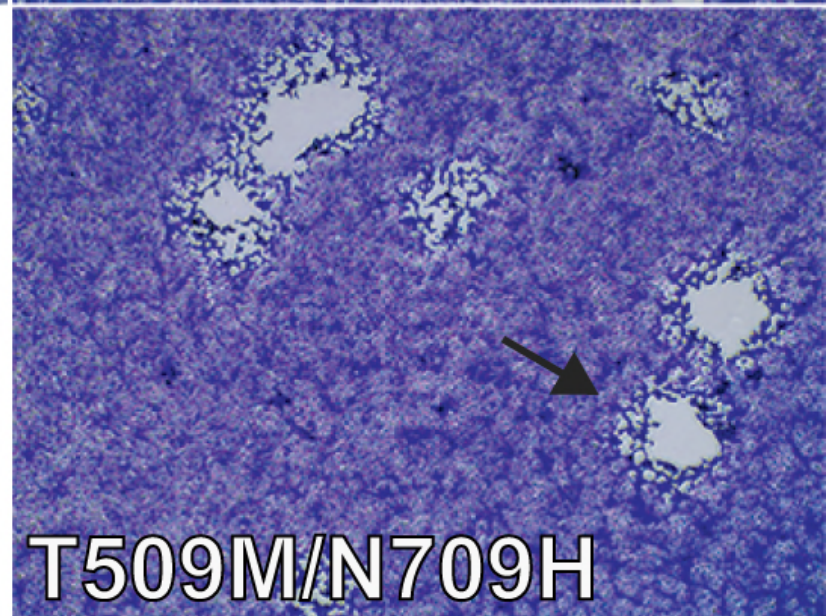

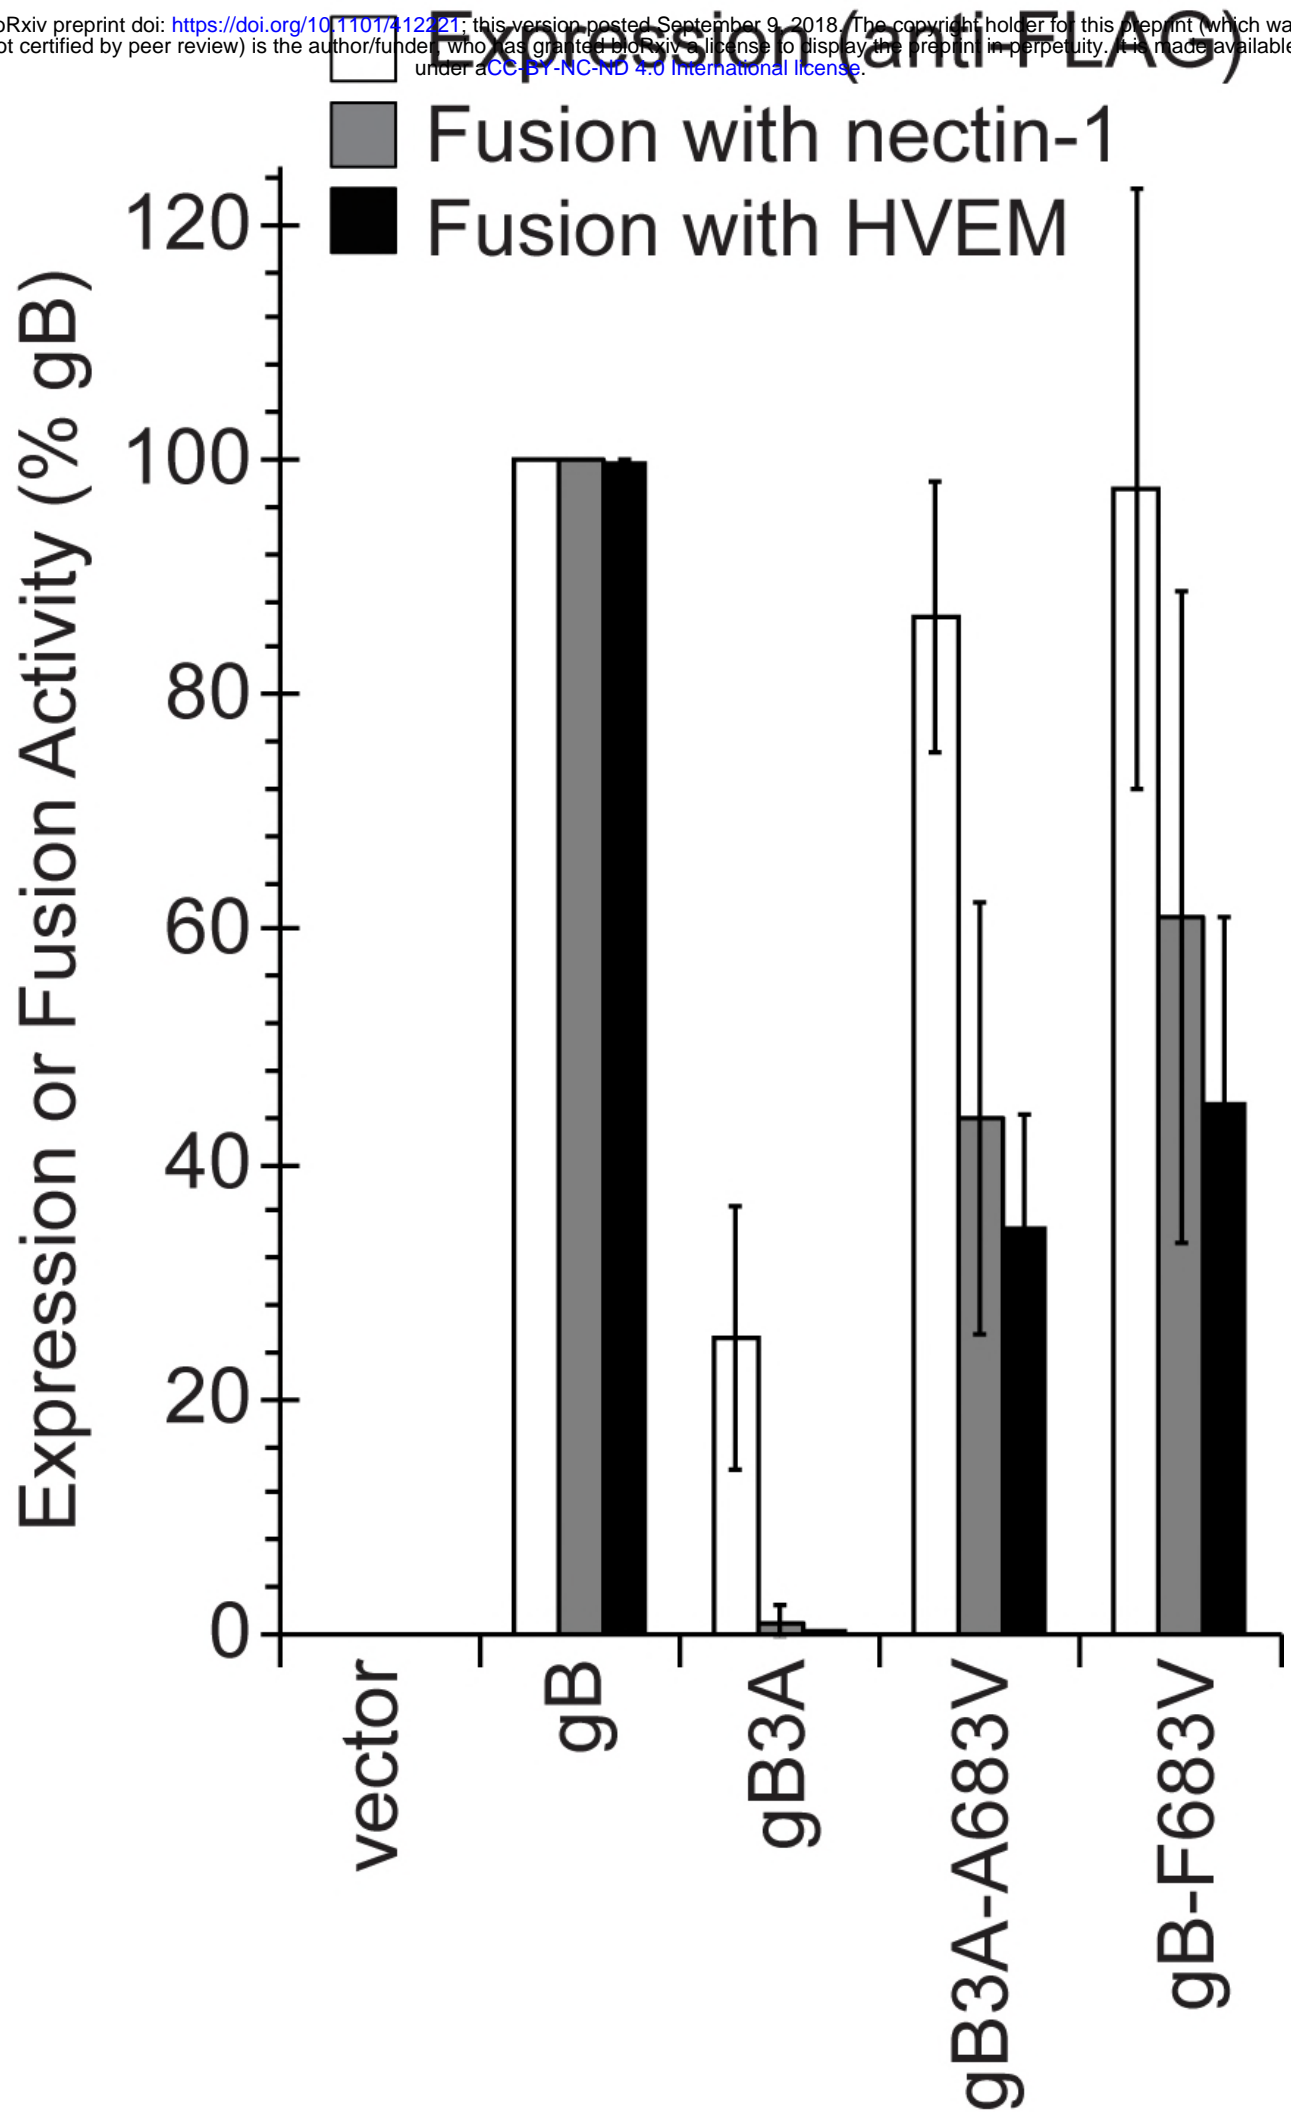

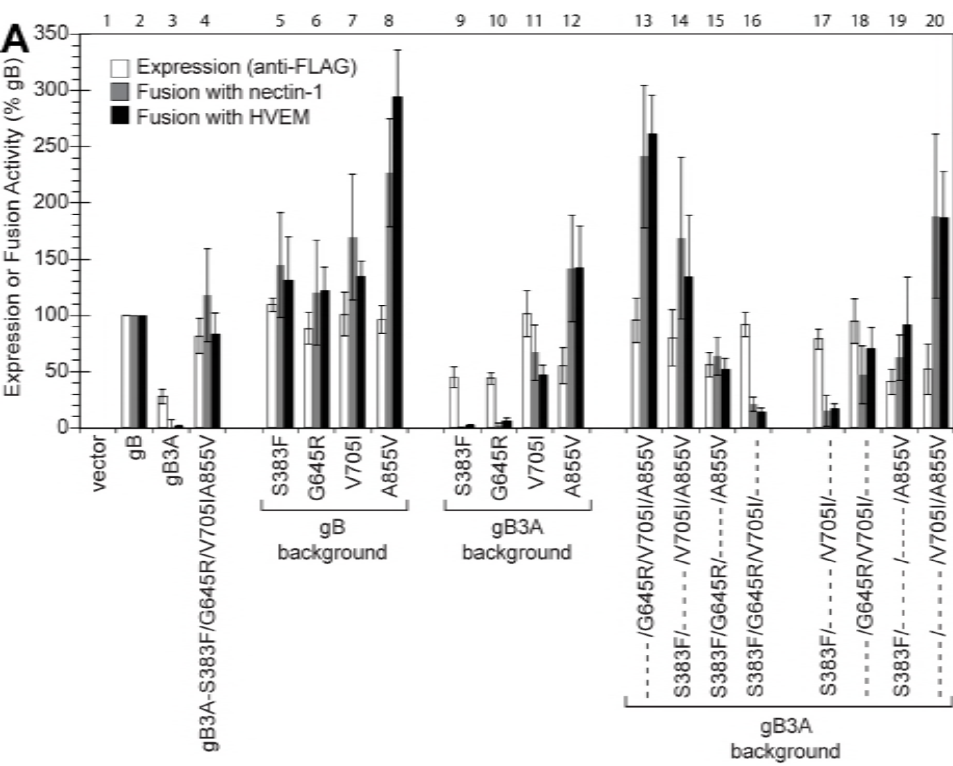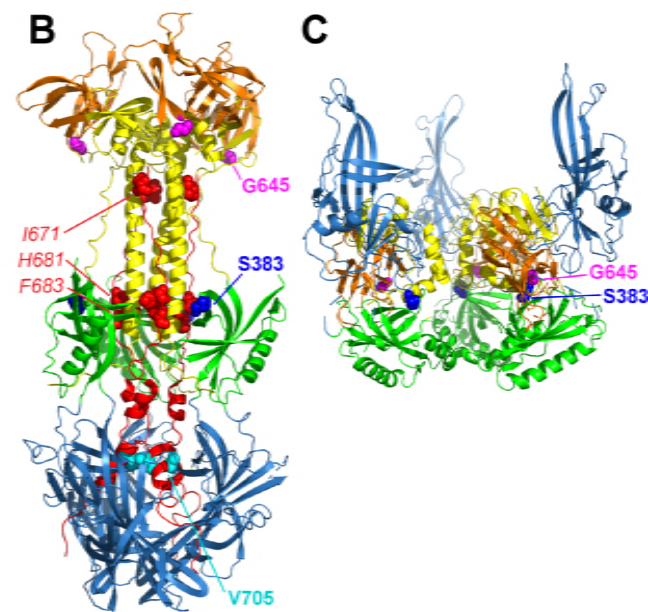

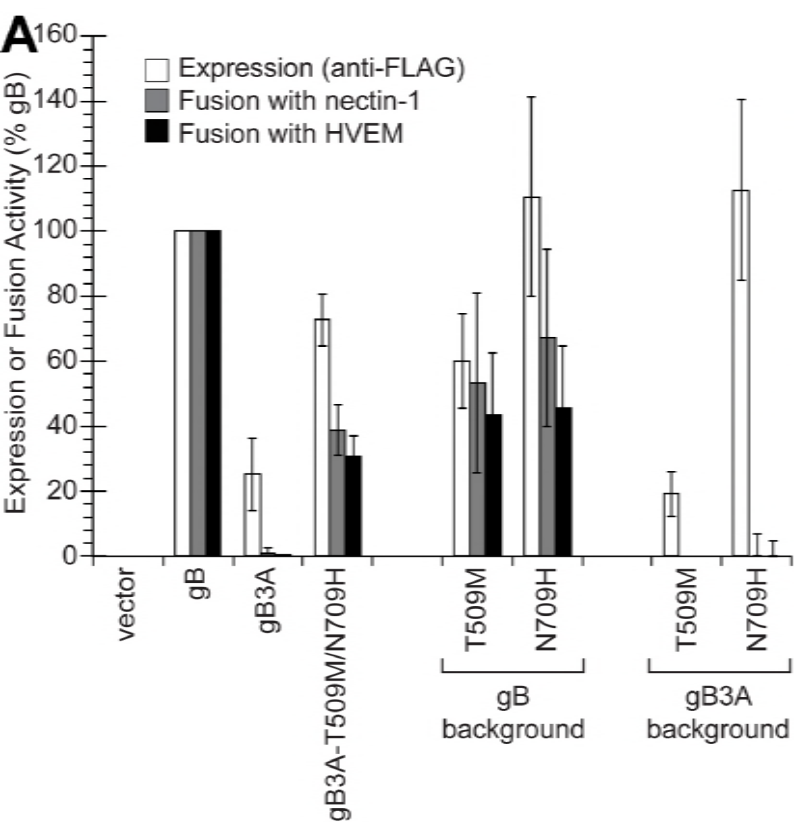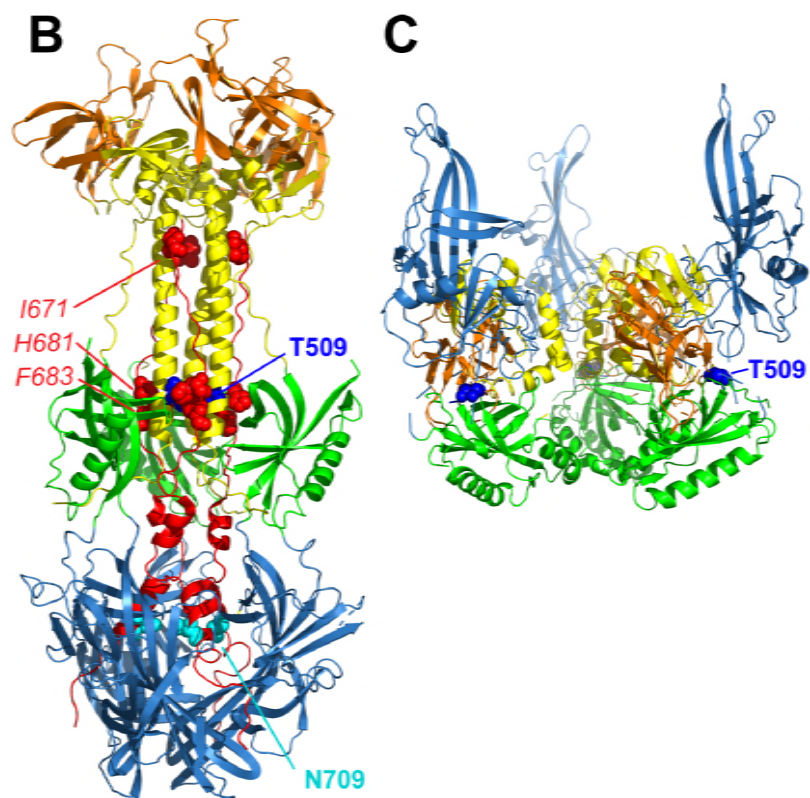

Source: https://www.biorxiv.org/content/10.1101/412221v1.full.pdf
